# Supplementary material
Source: publisher site journal article supplement (https://www.dovepress.com/article/225722)
Supplement: Supplementary file 1 [file get_supplementary_file.php]

# 1 Supplementary data

| Genes    | Primer Sequences           | Annealing Temperature |
|----------|----------------------------|-----------------------|
| Nestin   | F: CCCTGAAGTCGAGGAGCTG     | 60°C                  |
|          | R: CTGCTGCACCTCTAAGCGA     |                       |
| Tuj1     | F: TAGACCCCAGCGGCAACTAT    | 60°C                  |
|          | R: GTTCCAGGTTCCAAGTCCACC   |                       |
| GFAP     | F: GGGGCAAAAAGCACCAAAGAAG  | 60°C                  |
|          | R: GGGACAACCTTGATTGTGAGCC  |                       |
| Rap1     | F: ATGCGTGAGTACAAGCTAGTAGT | 60°C                  |
|          | R: GCGAAGCCTTGTCGGTCT      |                       |
| Vinculin | F: GAGGCTGAACTGCTTCAATCA   | 60°C                  |
|          | R: CCAGATTGACGAGGTGCCTA    |                       |
| Paxillin | F: GGCATCCCAGAAAATAACACTCC | 60°C                  |
|          | R: GCCCTGCATCTTGAAATCTGA   |                       |
| Gapdh    | F: AGGTCGGTGTGAACGGATTG    | 60°C                  |
|          | R: TGTAGACCATGTAGTTGAGGTCA |                       |
| TRPC2    | F: CTCAAGGGTATGTTGAAGCAGT  | 60°C                  |
|          | R: GTTGTTTGGGCTTACCACACT   |                       |

2

3 Figure. S1. Primer sequences for real-time PCR of target genes.

4

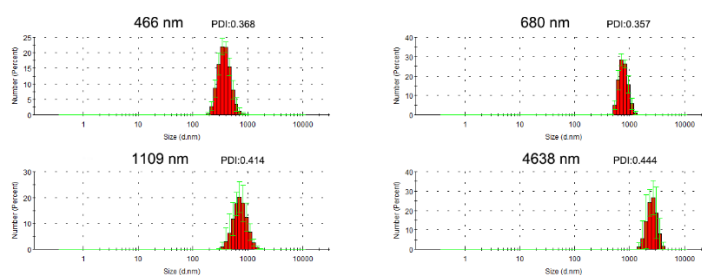

5

6 Figure. S2. Size distributions of GO NPs in cellular medium.

7

8

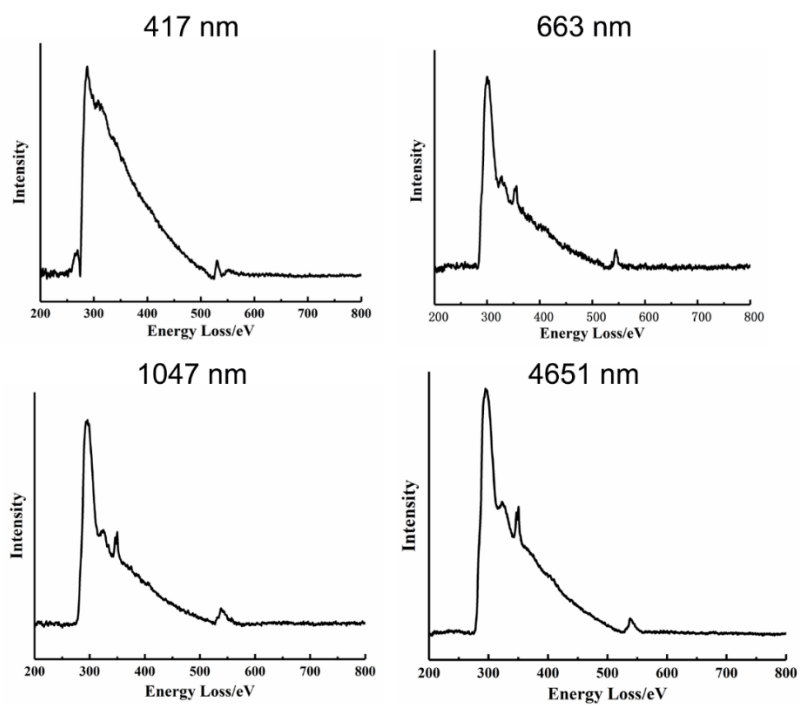

9

10 Figure.S3. The EELS Spectrum of Graphene Oxide.
